# Supplementary material for: Severe varicella-zoster virus pneumonia: a multicenter cohort study
Source: PubMed Central journal article supplement (PMC5463395; doi:10.1186/s13054-017-1731-0), 2017-06-07

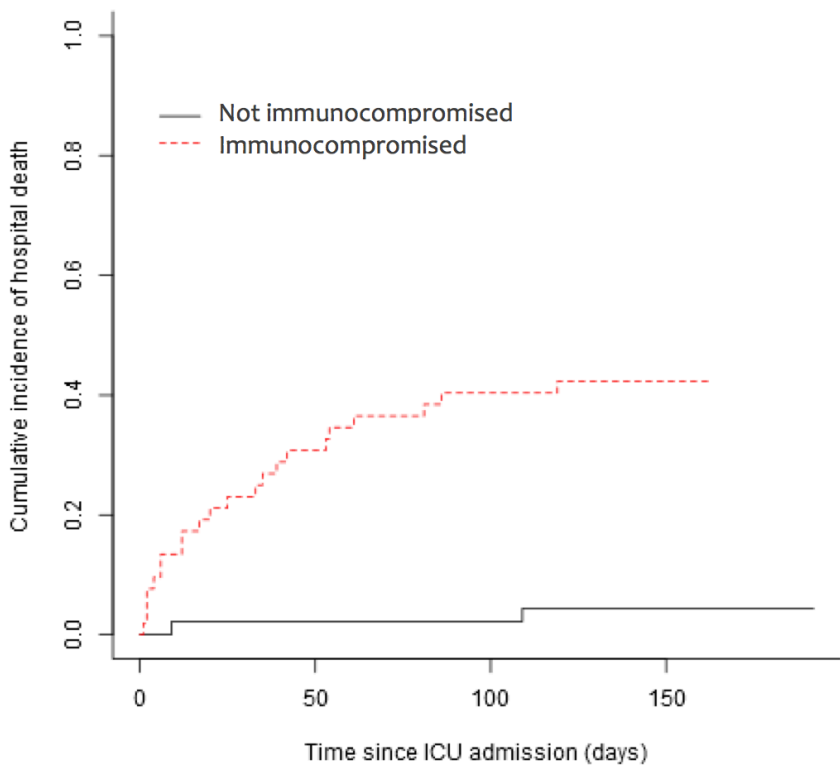

Supplement: 13054_2017_1731_MOESM6_ESM.pdf [file 13054_2017_1731_MOESM6_ESM.pdf]
